# Supplementary material
Source: ML conference proceedings conference paper supplement (https://openaccess.thecvf.com/content/WACV2023/html/Jo_CG-NeRF_Conditional_Generative_WACV_2023_paper.html)
Supplement: Supplementary file 2 [file Jo_CG-NeRF_Conditional_Generative_WACV_2023_supplemental.zip]

Archive with 1 entries (1 files):
- 0395-supp.pdf
